# Supplementary material for: Rapid liposome quality assessment using a lab-on-a-chip
Source: Royal Society of Chemistry journal article supplement (doi:10.1039/c0lc00589d), 2011-01-01
Supplement: c0lc00589d.pdf [file c0lc00589d.pdf]

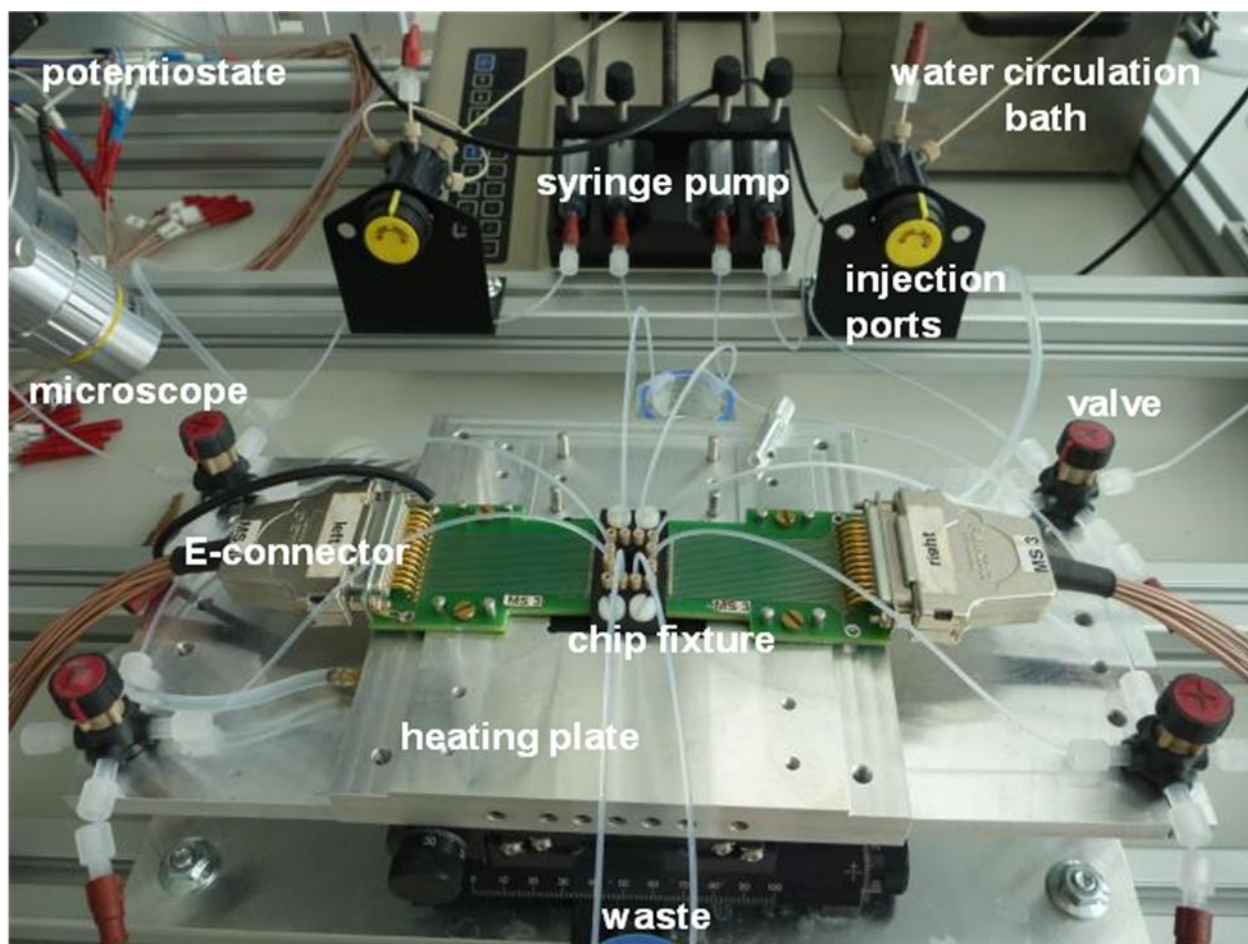

**Suppl. Fig. 1** Picture of the entire experimental microfluidic liposome analysis platform.

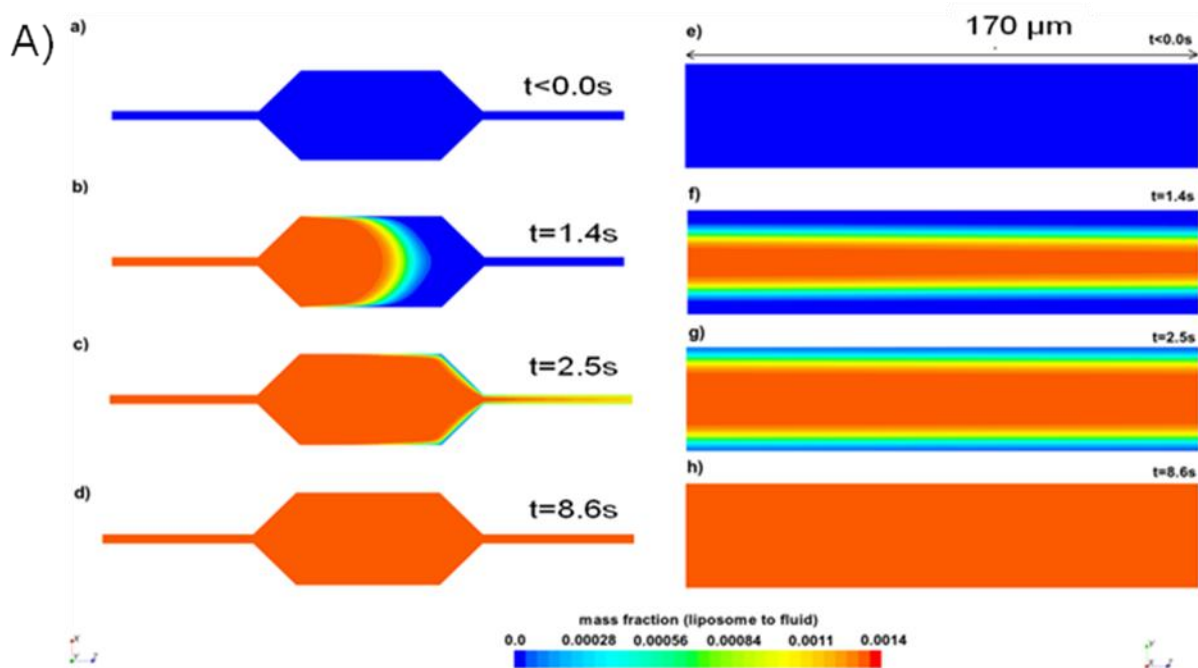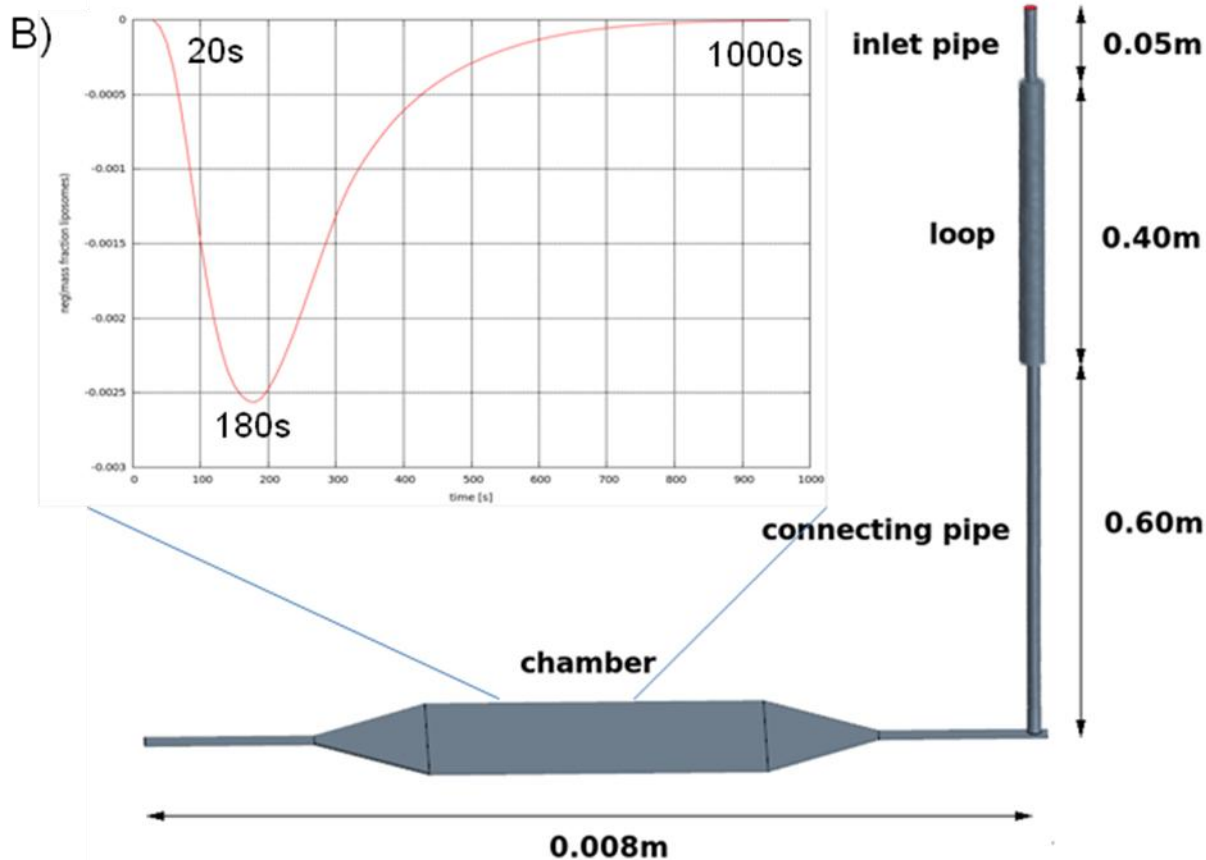

**Suppl. Fig. 2:** A) 3D-computational fluid dynamic simulations (CFD) of lipid vesicle's mass fractions plotted over time in the presence of  $5\mu\text{L}/\text{min}$  flow where a, b, c, and d show a top view at the central plane while e, f, g and h show a side view at the center of the monitoring chamber. B) Calculated volume fraction of liposomes inside the chamber based on a chip model including inlet pipe (dia  $0.254\text{mm}$ ), the feeding loop ( $20\mu\text{L}$ ) and a connecting pipe (dia  $0.13\text{mm}$ ).

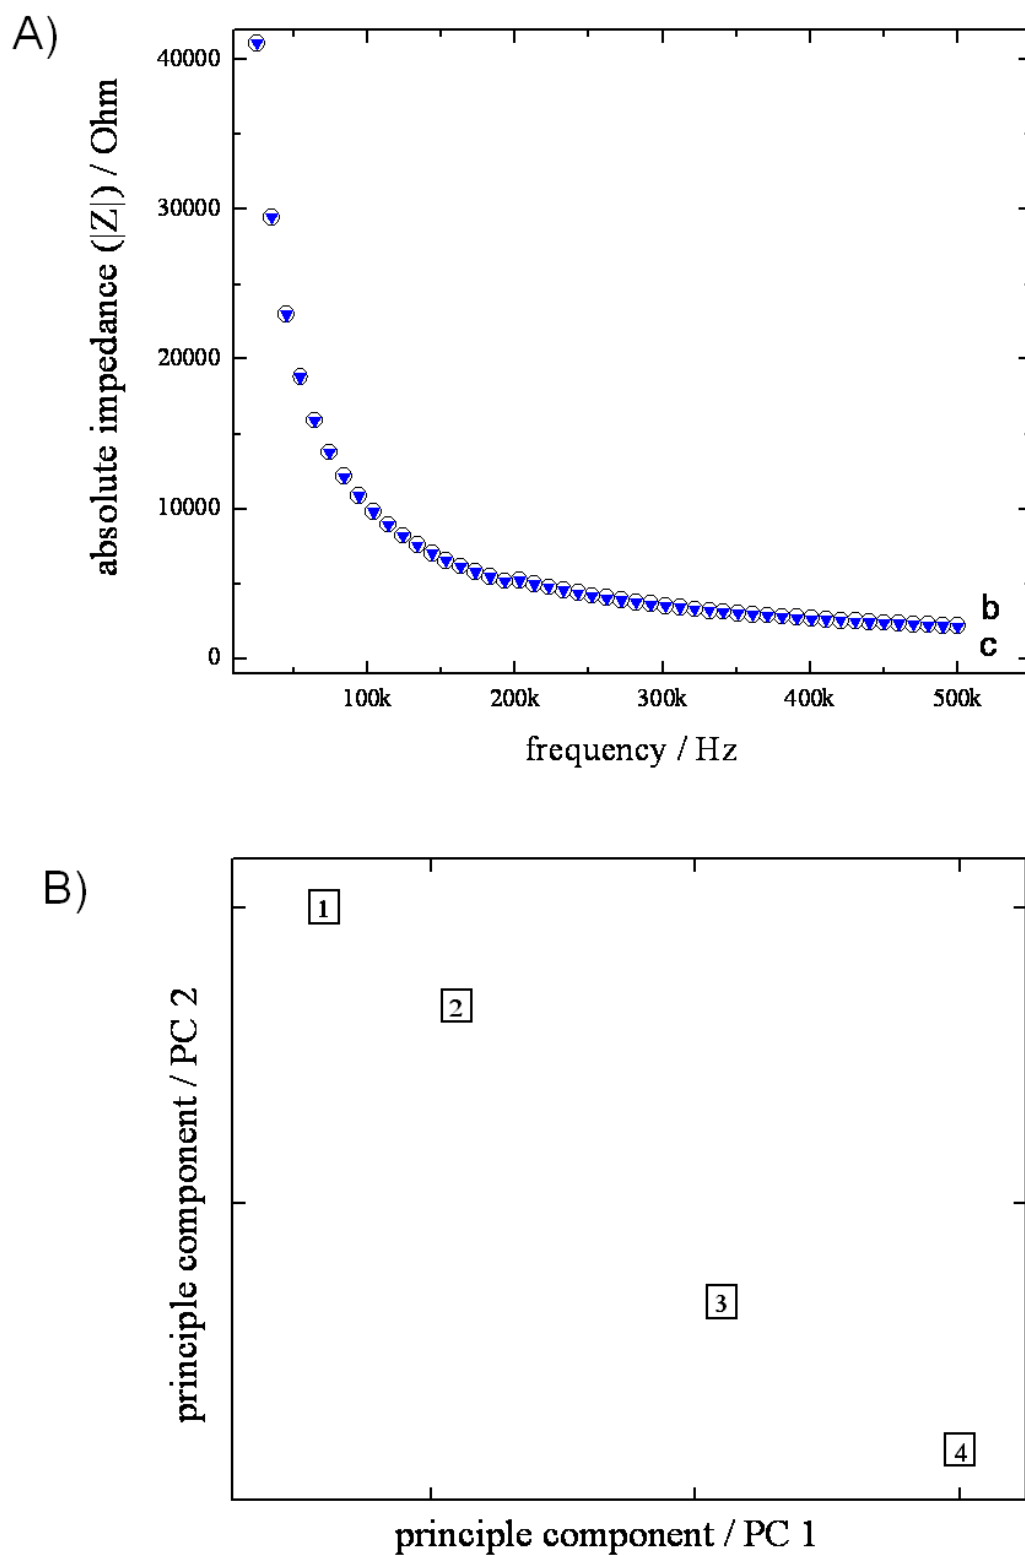

**Suppl. Fig. 3** A) Frequency dependent dielectric spectra of 5.26 mg/mL DPPC<sub>220</sub> (b) and DPPC-SOD (c) liposome formulations. B) Pattern recognition plot of averaged dielectric spectra (n=6) of DPPC<sub>220</sub> liposome formulation (b) prior [1] and after the addition of [2] 1%, [3] 10% and [4] 100% DPPC-SOD liposome formulations (c).
